# Supplementary material for: Three in one: engineering MOF channels via coordinated water arrays for regulated separation of alkanes and alkenes
Source: PubMed Central journal article supplement — Chem Sci. 2024 Nov 4;15(46):19556–63. doi: 10.1039/d4sc05286b (PMC11575533; doi:10.1039/d4sc05286b), 2024-11-04
Supplement: SC-OLF-D4SC05286B-s001.pdf [file SC-OLF-D4SC05286B-s001.pdf]

## Electronic Supplementary Information

### **Three in One: Engineering MOF Channels via Coordinated Water Arrays for Regulated Separation of Alkanes and Alkenes†**

Lu-Lu Ma,<sup>a,b</sup> Pavel N. Zolotarev,<sup>c</sup> Kang Zhou,<sup>b</sup> Xin Zhou,<sup>b</sup> Jiaqi Liu,<sup>b</sup> Jiafeng Miao,<sup>b</sup> Shenfang Li,<sup>b</sup> Guo-Ping Yang,<sup>\*a</sup> Yao-Yu Wang,<sup>a</sup> Davide M. Proserpio,<sup>\*c</sup> Jing Li,<sup>\*d,c</sup> Hao Wang<sup>\*b</sup>

<sup>a</sup>Key Laboratory of Synthetic and Natural Functional Molecule Chemistry of the Ministry of Education, Shaanxi Key Laboratory of Physico-Inorganic Chemistry, College of Chemistry & Materials Science, Northwest University, Xi'an 710127, P. R. China. E-mail: [ygp@nwu.edu.cn](mailto:ygp@nwu.edu.cn)

<sup>b</sup>Hoffmann Institute of Advanced Materials, Shenzhen Polytechnic 7098 Liuxian Blvd., Nanshan District, Shenzhen, Guangdong 518055, P. R. China. E-mail: [wanghao@szpt.edu.cn](mailto:wanghao@szpt.edu.cn)

<sup>c</sup>Dipartimento di Chimica, Università degli Studi di Milano, 20133 Milano, Italy. Email: [davide.proserpio@unimi.it](mailto:davide.proserpio@unimi.it)

<sup>d</sup>Department of Chemistry and Chemical Biology, Rutgers University, 123 Bevier Road, Piscataway, New Jersey 08854, United States. Email: [jingli@rutgers.edu](mailto:jingli@rutgers.edu)

## Supplementary Methods

**Search for isorecticular rod-MOFs.** The TopCryst service contains the data on the representatives of different topological types of all coordination networks collected in the CSD. The nets stored in the service are the result of the standard and cluster representation obtained using an automatic procedure, which guarantees rigor of the analysis and the coverage of the large amount of data. With these advantages comes the disadvantage, the rod-MOF representations are not stored because their construction requires user intervention in an *ad hoc* manner. Therefore, for the search of the analogous/isorecticular rod-net MOFs a workaround has been employed. First, we obtained the *standard representation* for **HIAM-317** in which metal atoms and ligand's center of mass serve as network nodes that results in the 6,8-connected **sea** net. The search in the TopCryst service revealed 42 structures of **sea** topological type, but not all 42 structures are rod-MOF, so we need to find those that can be described with the same rod net as in **HIAM-317**. We have applied the algorithm reported in [L. S. Xie, E. V. Alexandrov, G. Skorupskii, D. M. Proserpio and M. Dincă, Chem. Sci., 2019, 10, 8558–8565] to find the *point of extension and metal* (PE&M) description for **HIAM-317**, which results in the underlying net of the 3,4,6T325 topological type. We have obtained the PE&M representation for the 42 structures with **sea** topology and found that 26 of them are rod-MOF isorecticular with **HIAM-317** (see Table S3). A manual check of 26 structures, revealed that only the HIQLEB structure (UPC-101-Al) [Weidong Fan, Xia Wang, Ben Xu, Yutong Wang, Dandan Liu, Ming Zhang, Yizhu Shang, Fangna Dai, Liangliang Zhang, Daofeng Sun, Journal of Materials Chemistry A, 2018, 6, 24486, DOI: 10.1039/C8TA07839D] comprises the ligand most similar to the one in **HIAM-317**.

The standard **sea** or the PE&M 3,4,6T325 are not the best nets for a good visual description of Y-MOF, so we also computed the straight rod (STR) net. In the STR representation the biphenyl core of the tetratopic ligand was represented as two linked 3-connected nodes and the rods comprise carboxylate-connected yttrium atoms. From the figure below two –COO groups are pointing to Y and each Y is bridged to the next Y by an oxygen atom of the bridging OH and another bridge comes from one oxygen of the carboxylates.

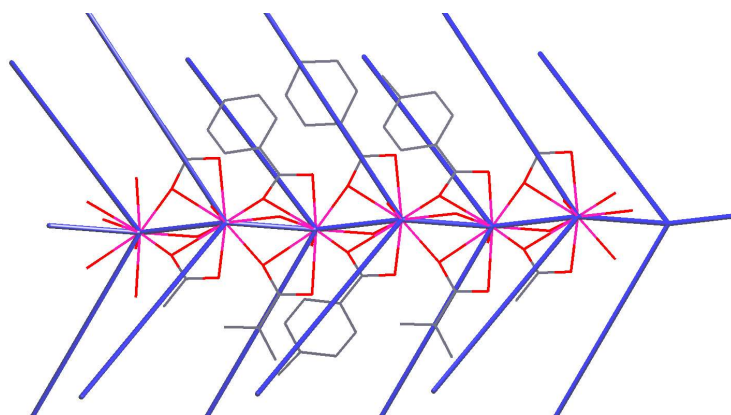

The unnecessary bonds between carboxylates and yttrium atoms were deleted, and after simplification the rods appear as a zig-zag chain of nodes. Each of these nodes is now 4-coordinated, linked to two PEs (the C atom of the carboxylate) attributed to two different ligands, in addition to two other nodes of the rod. The 3,4-coordinated net obtained in such way corresponds to the **jeb** topological type (see the figure above and S7b).

### General characterizations

All reagents were obtained from commercial sources and used without further purification. Single crystal X-ray diffraction data were collected on a 'Bruker D8 VENTURE' diffractometer. The data of **HIAM-317** and **HIAM-317a** were collected using MoK $\alpha$  ( $\lambda = 0.71073 \text{ \AA}$ ) and CuK $\alpha$  ( $\lambda = 1.5406 \text{ \AA}$ ), respectively. Using Olex2, the structures were solved with the ShelXT structure solution program using Intrinsic Phasing and refined with the ShelXL refinement package using Least Squares minimization. Powder X-ray diffraction patterns were recorded on a Bruker D8 Advance with Cu K $\alpha$  radiation ( $\lambda = 1.5406 \text{ \AA}$ ). Data were collected at room temperature at  $2\theta = 3 \sim 40^\circ$ . Thermogravimetric measurements were performed on a thermal analyzer (TGA 550, TA Instruments) in N<sub>2</sub> atmosphere and the ramping rate was 10 °C/min. Scanning electron micrographs (SEM) images were taken using a JEOL JSM-IT800 (SHL). X-ray Photoelectron Spectroscopy (XPS) (including high-resolution spectrum) data were collected on Thermo Fisher ESCALAB 250Xi. C<sub>2</sub>H<sub>4</sub>, and C<sub>2</sub>H<sub>6</sub> adsorption isotherms were measured on a Micromeritics 3Flex analyzer, while C<sub>3</sub>H<sub>6</sub>, and C<sub>3</sub>H<sub>8</sub> adsorption isotherms were measured on a BSD-660. For each adsorption experiment, ~100 mg of MOF sample was activated 12 hours prior to data collection.

### Synthesis of **HIAM-317**

H<sub>4</sub>TCHB (20 mg, 0.03 mmol), 2-fluorobenzoic acid (500 mg, 3.57 mmol), Y(NO<sub>3</sub>)<sub>3</sub>·6H<sub>2</sub>O (40.0 mg,

0.10 mmol), DMF (4 mL), and H<sub>2</sub>O (4 mL) were combined in a 20 mL Teflon bomb (Xi'an Taikang Technology Co., Ltd.) and the mixture was heated at 130 °C for 72 hours. After cooling down to room temperature, the obtained crystals were washed by DMF and then exchanged with CH<sub>2</sub>Cl<sub>2</sub> 3 times daily for 3 days. The solvent-exchanged samples were directly activated at 120 °C or 300 °C under dynamic vacuum for 12 hours to yield activated samples.

### Breakthrough measurements

Breakthrough experiments were carried out in an auto mixed-gas breakthrough apparatus mixSorb S (manufactured by 3P Instruments and distributed by JWGB Instruments) equipped with a mass spectrum (MKS Circus 3). 1.58 g of adsorbent was packed into a steel column (I.D. 4 mm, volume 1 ml) and was activated at 120 or 300 °C for 4 hours under helium purging (10 ml/min) prior to measurements. When the temperature was cooled down to 25 °C, helium flow was stopped and the feed mixed gases at a flow rate of 1 mL/min were introduced to the adsorption column. The outlet gas was analyzed using a mass spectrometer. After the adsorption reached dynamic equilibrium, the column was purged with helium (10 mL/min) at 120 °C for 1 hour for regeneration.

### Fitting adsorption heat of pure component isotherms

$$\ln P = \ln N + 1/T \sum_{i=0}^m a_i N^i + \sum_{i=0}^n b_i N^i \quad (1)$$

$$Q_{st} = -R \sum_{i=0}^m a_i N^i \quad (2)$$

The above virial expression was used to fit the combined isotherm data for **HIAM-317b** at 273 and 298 K ( $P$  is the pressure,  $N$  is the adsorbed amount,  $T$  is the temperature,  $a_i$  and  $b_i$  are virial coefficients, and  $m$  and  $N$  are the number of coefficients used to describe the isotherms).  $Q_{st}$  is the coverage-dependent enthalpy of adsorption and  $R$  is the universal gas constant.

### Selectivity prediction via IAST

The experimental isotherm data for pure gas A, and gas B were fitted at 273 and 298 K using a Langmuir-Freundlich (L-F) model:

$$q = \frac{a_1 * b_1 * P^{c_1}}{1 + b_1 * P^{c_1}} + \frac{a_2 * b_2 * P^{c_2}}{1 + b_2 * P^{c_2}} \quad (3)$$

Where  $q$  and  $p$  were adsorbed amounts and the pressure of component  $i$ , respectively.

The adsorption selectivities for binary mixtures of gas A/gas B, defined by

$$S_{i/j} = \frac{x_i * y_j}{x_j / y_i} \quad (4)$$

were respectively calculated using the Ideal Adsorption Solution Theory (IAST) of Myers and Prausnitz. Where  $x_i$  is the mole fraction of component  $i$  in the adsorbed phase and  $y_i$  is the mole fraction of component  $i$  in the bulk.

#### ***Ab initio* calculations and simulation details.**

We used the DFT as implemented in the Vienna *Ab initio* simulation package (VASP) in all calculations. The exchange-correlation potential is described by using the generalized gradient approximation of Perdew-Burke-Ernzerhof (GGA-PBE). The projector augmented-wave (PAW) method is employed to treat interactions between ion cores and valence electrons. The plane-wave cutoff energy was fixed to 500 eV. Given structural models were relaxed until the Hellmann–Feynman forces smaller than  $-0.02$  eV/Å and the change in energy smaller than  $10^{-5}$  eV was attained. During the relaxation, the Brillouin zone was represented by a  $\Gamma$  centered k-point grid of  $10 \times 10 \times 1$ . Grimme’s DFT-D3 methodology was used to describe the dispersion interactions among all the atoms in adsorption models. And we used pymatgen to simulate the adsorption sites of the structure.

**Table S1.** Comparison for molecular sizes and physical properties of C<sub>2</sub>H<sub>4</sub>, C<sub>2</sub>H<sub>6</sub>, C<sub>3</sub>H<sub>6</sub> and C<sub>3</sub>H<sub>8</sub>.

| Compounds                     | Ball and Stick model                                                              | Dimensions (10 <sup>-10</sup> m) | Kinetic Diameter (10 <sup>-10</sup> m) | Boiling point (K) |
|-------------------------------|-----------------------------------------------------------------------------------|----------------------------------|----------------------------------------|-------------------|
| C <sub>2</sub> H <sub>4</sub> |  | 3.28×4.18×4.84                   | 4.2                                    | 169.5             |
| C <sub>2</sub> H <sub>6</sub> |  | 3.81×4.08×4.82                   | 4.4                                    | 184.6             |
| C <sub>3</sub> H <sub>6</sub> |  | 4.65×4.16×6.44                   | 4.6                                    | 225.45            |
| C <sub>3</sub> H <sub>8</sub> |  | 4.20×4.60×6.80                   | 4.3                                    | 231.05            |

**Table S2.** Crystallographic data for **HIAM-317** and **HIAM-317a**.

| Compound                                                                                  | HIAM-317                                         | HIAM-317a                                        |
|-------------------------------------------------------------------------------------------|--------------------------------------------------|--------------------------------------------------|
| Chemical formula                                                                          | C <sub>23</sub> H <sub>20</sub> O <sub>6</sub> Y | C <sub>23</sub> H <sub>20</sub> O <sub>6</sub> Y |
| Formula weight                                                                            | 481.30                                           | 481.30                                           |
| <i>T</i> (K)                                                                              | 200 K                                            | 253 K                                            |
| Radiation (Å)                                                                             | MoKα (λ = 0.71073)                               | CuKα (λ = 1.54178)                               |
| Crystal system                                                                            | Orthorhombic                                     | Orthorhombic                                     |
| Space group                                                                               | <i>Ibam</i>                                      | <i>Ibam</i>                                      |
| <i>a</i> , <i>b</i> , <i>c</i> (Å)                                                        | 6.7432(2),<br>24.8499(9),<br>31.0273(11)         | 6.7374(7),<br>24.870(3),<br>30.881(4)            |
| <i>α</i> , <i>β</i> , <i>γ</i> (°)                                                        | 90, 90, 90                                       | 90, 90, 90                                       |
| <i>V</i> (Å <sup>3</sup> )                                                                | 5199.2(3)                                        | 5174.4(10)                                       |
| <i>Z</i>                                                                                  | 8                                                | 8                                                |
| Density (calculated) (g cm <sup>-3</sup> )                                                | 1.230                                            | 1.236                                            |
| <i>μ</i> (mm <sup>-1</sup> )                                                              | 2.273                                            | 3.443                                            |
| Reflections collected / unique / <i>R</i> <sub>int</sub>                                  | 28731 / 2736 / 0.1079                            | 10327 / 2151 / 0.2428                            |
| Goodness-of-fit on <i>F</i> <sup>2</sup>                                                  | 1.045                                            | 1.010                                            |
| <i>R</i> <sub>1</sub> <sup>a</sup> , <i>wR</i> <sub>2</sub> <sup>b</sup> ( <i>I</i> > 2σ) | 0.0392 / 0.0951                                  | 0.0982 / 0.2399                                  |
| <i>R</i> <sub>1</sub> <sup>a</sup> , <i>wR</i> <sub>2</sub> <sup>b</sup> (all data)       | 0.0558 / 0.1032                                  | 0.1308 / 0.2661                                  |

$$^a R_1 = \frac{\sum ||F_o| - |F_c||}{\sum |F_o|}; \quad ^b wR_2 = [\frac{\sum w(F_o^2 - F_c^2)^2}{\sum w(F_o^2)^2}]^{1/2}$$

**Table S3.** Selected bond lengths (Å) and angles (°) for **HIAM-317**.

|                    |            |                    |            |
|--------------------|------------|--------------------|------------|
| Y(1)-Y(1)#1        | 3.5839(3)  | Y(1)-O(2)          | 2.355(2)   |
| Y(1)-O(1)#2        | 2.317(3)   | Y(1)-O(2)#4        | 2.437(2)   |
| Y(1)-O(1)          | 2.258(3)   | Y(1)-O(3)          | 2.336(4)   |
| Y(1)-O(2)#2        | 2.437(2)   | Y(1)-O(4)#2        | 2.475(2)   |
| Y(1)-O(2)#3        | 2.355(2)   | Y(1)-O(4)#4        | 2.475(2)   |
| O(1)#2-Y(1)-Y(1)#1 | 102.52(7)  | O(2)#3-Y(1)-Y(1)#1 | 42.46(5)   |
| O(1)-Y(1)-Y(1)#1   | 39.02(8)   | O(2)#2-Y(1)-Y(1)#1 | 144.85(5)  |
| O(1)-Y(1)-O(1)#2   | 141.55(9)  | O(2)#3-Y(1)-O(2)#4 | 145.90(5)  |
| O(1)#2-Y(1)-O(2)#3 | 77.84(8)   | O(2)#3-Y(1)-O(2)#2 | 103.04(7)  |
| O(1)#2-Y(1)-O(2)   | 77.84(8)   | O(2)-Y(1)-O(2)#4   | 103.04(7)  |
| O(1)-Y(1)-O(2)#3   | 70.48(9)   | O(2)#3-Y(1)-O(2)   | 67.87(10)  |
| O(1)-Y(1)-O(2)#2   | 139.62(7)  | O(2)-Y(1)-O(2)#2   | 145.90(5)  |
| O(1)-Y(1)-O(2)#4   | 139.62(7)  | O(2)#2-Y(1)-O(2)#4 | 65.30(9)   |
| O(1)-Y(1)-O(2)     | 70.48(9)   | O(2)#3-Y(1)-O(4)#4 | 138.39(8)  |
| O(1)#2-Y(1)-O(2)#4 | 68.07(8)   | O(2)#4-Y(1)-O(4)#4 | 52.56(7)   |
| O(1)#2-Y(1)-O(2)#2 | 68.07(8)   | O(2)#3-Y(1)-O(4)#2 | 71.23(8)   |
| O(1)#2-Y(1)-O(3)   | 139.41(12) | O(2)-Y(1)-O(4)#2   | 138.39(8)  |
| O(1)-Y(1)-O(3)     | 79.04(13)  | O(2)#2-Y(1)-O(4)#2 | 52.56(7)   |
| O(1)-Y(1)-O(4)#4   | 89.11(6)   | O(2)#2-Y(1)-O(4)#4 | 115.18(7)  |
| O(1)-Y(1)-O(4)#2   | 89.11(6)   | O(2)-Y(1)-O(4)#4   | 71.24(8)   |
| O(1)#2-Y(1)-O(4)#2 | 101.00(7)  | O(2)#4-Y(1)-O(4)#2 | 115.18(7)  |
| O(1)#2-Y(1)-O(4)#4 | 101.00(7)  | O(3)-Y(1)-Y(1)#1   | 118.06(10) |
| O(2)#4-Y(1)-Y(1)#1 | 144.85(5)  | O(3)-Y(1)-O(2)#4   | 78.04(10)  |
| O(2)-Y(1)-Y(1)#1   | 42.46(5)   | O(3)-Y(1)-O(2)#2   | 78.04(10)  |
| O(3)-Y(1)-O(2)#3   | 133.00(9)  | O(4)#4-Y(1)-Y(1)#1 | 99.72(5)   |
| O(3)-Y(1)-O(2)     | 133.00(9)  | O(4)#2-Y(1)-O(4)#4 | 146.56(13) |
| O(3)-Y(1)-O(4)#4   | 73.44(7)   | Y(1)-O(1)-Y(1)#1   | 103.14(13) |
| O(3)-Y(1)-O(4)#2   | 73.44(7)   | Y(1)-O(2)-Y(1)#1   | 96.82(7)   |
| O(4)#2-Y(1)-Y(1)#1 | 99.72(5)   |                    |            |

Symmetry transformations used to generate equivalent atoms: #1  $x-1/2, -y+3/2, -z+1$ ; #2  $x+1/2, -y+3/2, -z+1$ ; #3  $x, y, -z+1$ ; #4  $x+1/2, -y+3/2, z$ ; #5  $-x+1, -y+1, z$ ; #6  $-x+1, y, -z+1/2$ .



**Table S4.** The 26 isorecticular structures with 3,4,6T325 PE&M underlying net observed in **HIAM-317**.

| refcode | composition                 | Space Group | Name                                                                                                                                                            |
|---------|-----------------------------|-------------|-----------------------------------------------------------------------------------------------------------------------------------------------------------------|
| GUKVEO  | C10 H4 Al2 O10              | Pbam        | ( $\mu$ 8-Benzene-1,2,4,5-tetracarboxylato)-bis( $\mu$ 2-hydroxo)-di-aluminium) MIL-118B                                                                        |
| GUKVIS  | C10 H9.5 Al2 O12.75         | Pnam        | ( $\mu$ 8-Benzene-1,2,4,5-tetracarboxylato)-bis( $\mu$ 2-hydroxo)-di-aluminium hydrate) MIL-118C                                                                |
| GUXQAR  | C10 H12 O14 V2              | P-1         | ( $\mu$ 8-1,2,4,5-Benzenetetracarboxylato)-bis( $\mu$ 2-hydroxo)-di-vanadium(iii) tetrahydrate) MIL-60                                                          |
| HALTUM  | C60 H60 N4 Ni4 O22          | P21/m       | bis( $\mu$ -1,1':4',1''-terphenyl-2',4,4'',5'-tetracarboxylato)-bis( $\mu$ -N,N-dimethylacetamide)-bis( $\mu$ -aqua)-tetra-nickel N,N-dimethylacetamide solvate |
| HERYOT  | C14 H8 O10 Zn2              | Pbam        | ( $\mu$ 8-1,4,5,8-Naphthalenetetracarboxylato)-di-aqua-di-zinc)                                                                                                 |
| HIQLEB  | C40 H31 Al2 N2 O12.5        | Cmmm        | bis( $\mu$ -hydroxo)-( $\mu$ -3,3',5,5'-tetrakis(4-carboxylatophenyl)[1,1'-biphenyl-4,4'-diamine]-di-aluminium(iii) hydrate UPC-101-A1                          |
| LURRUM  | C53 H53 In2 N3 O17          | Cmmm        | $\mu$ 8-4,4',4'',4'''-(Pyrene-1,3,6,8-tetrayl)tetrabenzoato)-bis( $\mu$ 2-hydroxo)-di-indium(iii) dimethylformamide solvate tetrahydrate                        |
| NUFYAP  | C28 H12 Al4 O20             | P21/c       | bis( $\mu$ 8-1,4,5,8-Naphthalenetetracarboxylato)-tetrakis( $\mu$ 2-hydroxo)-tetra-aluminium)                                                                   |
| NUFYET  | C14 H6 Ga2 O10              | P21/c       | ( $\mu$ 8-1,4,5,8-Naphthalenetetracarboxylato)-bis( $\mu$ 2-hydroxo)-di-gallium)                                                                                |
| NUFYIX  | C14 H6 In2 O10              | P21/c       | ( $\mu$ 8-1,4,5,8-Naphthalenetetracarboxylato)-bis( $\mu$ 2-hydroxo)-tetra-indium)                                                                              |
| QUCFUR  | C16 H10 Al2 O13 S1          | P-1         | $\mu$ 8-4,4'-Sulfonyldibenzene-1,2-dicarboxylato)-bis( $\mu$ 2-hydroxo)-di-aluminium monohydrate CAU-12-dehy                                                    |
| RAYYOI  | C48 H33.1 Al2 Co1 N4 O13.55 | Cmmm        | $\mu$ -5,10,15,20-tetrakis(4-carboxylatophenyl)porphyrinato)-bis( $\mu$ -hydroxo)-di-aluminium-cobalt hydrate                                                   |
| SULZOR  | C24 H10 O10 Sc2             | P21/c       | bis( $\mu$ -hydroxo)-( $\mu$ -perylene-3,4,9,10-tetracarboxylato)-di-scandium) Sc-CAU-9-PTCDA                                                                   |
| SUMBAG  | C34 H22 O11 Sc2             | Cmmm        | ( $\mu$ -1,2,4,5-tetrakis(4-carboxylatophenyl)benzene)-bis( $\mu$ -hydroxo)-                                                                                    |

|          |                        |       |                                                                                                                                                               |
|----------|------------------------|-------|---------------------------------------------------------------------------------------------------------------------------------------------------------------|
|          |                        |       | di-scandium hydrate) Sc-CAU-9-TCPB                                                                                                                            |
| TAPCIX   | C14 H8 Mn2 O10         | Pbam  | mu8-Naphthalene-1,4,5,8-tetracarboxylato)-bis(mu2-aqua)-di-manganese(ii)                                                                                      |
| UMARIL   | C60 H60 Mg4 N4 O22     | P21/n | bis(mu8-1,1':4',1''-Terphenyl-2',4,4'',5'-tetracarboxylato)-bis(mu2-aqua)-bis(mu2-dimethylacetamide)-tetra-magnesium dimethylacetamidesolvate)                |
| VUFJUE   | C48 H24 Fe2 N4 Ni1 O10 | Cmmm  | mu-4,4',4'',4'''-(porphyrin-5,10,15,20-tetrayl)tetrabenzoato)-bis(mu-oxo)-di-iron(iii)-nickel(ii) unknown solvate                                             |
| VUFRIA   | C48 H26 Cu1 Fe2 N4 O10 | Cmmm  | bis(mu-hydroxo)-(mu-4,4',4'',4'''-(porphyrin-5,10,15,20-tetrayl)tetrabenzoato)-copper-di-iron unknown solvate) Cu-PMOF-3(Fe)                                  |
| WIXKOG   | C32 H18 Ga2 N2 O10     | Cmmm  | mu-2,3,5,6-tetrakis(4-carboxylatophenyl)pyrazine)-bis(mu-hydroxo)-di-gallium unknown solvate                                                                  |
| XAJQAC   | C58.7 H40.8 In2 O10    | P2/c  | mu8-4,4',4'',4'''-(Pyrene-1,3,6,8-tetrayl)tetrabenzoato)-bis(mu2-hydroxo)-di-indium(iii) toluene solvate                                                      |
| XIHWUI   | C64 H60 Mn4 N4 O22     | P21/c | bis(mu8-1,1':4',1''-Terphenyl-2',4,4'',5'-tetracarboxylato)-bis(mu2-1-methylpyrrolidin-2-one)-bis(mu2-aqua)-tetra-manganese(ii)bis(1-methylpyrrolidin-2-one)) |
| XIHXAP   | C60 H60 Mn4 N4 O22     | P21/c | bis(mu8-1,1':4',1''-Terphenyl-2',4,4'',5'-tetracarboxylato)-bis(mu2-N,N-dimethylacetamide)-bis(mu2-aqua)-tetra-manganese(ii)N,N-dimethylacetamide solvate)    |
| XIHXAP01 | C60 H60 Mn4 N4 O22     | P21/n | bis(mu8-1,1':4',1''-Terphenyl-2',4,4'',5'-tetracarboxylato)-bis(mu2-N,N-dimethylacetamide)-bis(mu2-aqua)-tetra-manganese(ii)N,N-dimethylacetamide solvate)    |
| XIXCIT   | C50 H40 Ca2 N2 O12     | Pbam  | bis(mu-aqua)-(mu-4,4',4'',4'''-(pyrene-1,3,6,8-tetrayl)tetrabenzoato)-di-calcium N,N-dimethylformamide solvate SION-8                                         |
| XIXCIT01 | C44 H26 Ca2 O10        | Pbam  | mu-4,4',4'',4'''-(pyrene-1,3,6,8-tetrayl)tetrabenzoato)-bis(mu-aqua)-di-calcium unknown solvate ECUT-50                                                       |
| XOCROY   | C12 H8 Al2 O16         | Cmcm  | mu8-1,4-dicarboxybenzene-2,3,5,6-tetracarboxylato)-bis(mu2-hydroxo)-di-aluminium dihydrate                                                                    |

**Table S5.** Fitting parameters of Clausius-Clapeyron isotherm model.

|                  | <b>C<sub>2</sub>H<sub>4</sub></b> | <b>C<sub>2</sub>H<sub>6</sub></b> | <b>C<sub>3</sub>H<sub>6</sub></b> | <b>C<sub>3</sub>H<sub>8</sub></b> |
|------------------|-----------------------------------|-----------------------------------|-----------------------------------|-----------------------------------|
| a <sub>0</sub>   | -2713.86452                       | -2890.50882                       | -5934.47367                       | -5050.18038                       |
| a <sub>1</sub>   | 4.84593                           | -2.522                            | 24.50682                          | 17.89267                          |
| a <sub>2</sub>   | 0                                 | 0.18538                           | -0.7099                           | 0                                 |
| a <sub>3</sub>   | 0                                 | -0.00411                          | 0.0086                            | 0                                 |
| a <sub>4</sub>   | 0                                 | 6.88127E-5                        | -2.65842E-5                       | 0                                 |
| a <sub>5</sub>   | 0                                 | -3.50807E-7                       | 0                                 | 0                                 |
| b <sub>0</sub>   | 10.97584                          | 11.12985                          | 18.55703                          | 14.06149                          |
| Chi <sup>2</sup> | 5.25118E-5                        | 3.51159E-5                        | 0.04394                           | 0.14364                           |
| R <sup>2</sup>   | 0.99838                           | 0.99999                           | 0.97922                           | 0.94557                           |

**Table S6.** Fitting parameters of Dual-site Langmuir-Freundlich isotherm model.

|                  | <b>C<sub>2</sub>H<sub>4</sub></b> | <b>C<sub>2</sub>H<sub>6</sub></b> | <b>C<sub>3</sub>H<sub>6</sub></b> | <b>C<sub>3</sub>H<sub>8</sub></b> | <b>T (K)</b> |
|------------------|-----------------------------------|-----------------------------------|-----------------------------------|-----------------------------------|--------------|
| a <sub>0</sub>   | 2.29687                           | 1.97407                           | 1.7193                            | 3.29593                           | 273          |
| b <sub>1</sub>   | 0.02718                           | 0.04994                           | 0.01978                           | 0.01138                           | 273          |
| c <sub>1</sub>   | 1.12517                           | 1.17578                           | 0.95261                           | 1.00967                           | 273          |
| a <sub>2</sub>   | 12.7428                           | 10.83435                          | 2.15593                           | 0.03324                           | 273          |
| b <sub>2</sub>   | 0.00225                           | 0.00432                           | 0.00116                           | 6.79306E-5                        | 273          |
| c <sub>2</sub>   | 0.62794                           | 0.57792                           | 1.48208                           | 2.78521                           | 273          |
| Chi <sup>2</sup> | 4.65549E-6                        | 3.5282E-6                         | 1.59273E-6                        | 5.73621E-7                        | 273          |
| R <sup>2</sup>   | 0.9999                            | 0.9999                            | 0.9999                            | 0.9999                            | 273          |
| a <sub>0</sub>   | 2.11429                           | 0.29386                           | 0.067                             | 0.23411                           | 298          |
| b <sub>1</sub>   | 0.81647                           | 0.01353                           | 8.63816E-8                        | 0.00345                           | 298          |
| c <sub>1</sub>   | 1.16375                           | 1.91403                           | 4.58816                           | 2.38034                           | 298          |
| a <sub>2</sub>   | 0.33265                           | 1.72784                           | 2.09881                           | 1.49042                           | 298          |
| b <sub>2</sub>   | 0.00842                           | 1.51                              | 0.23671                           | 0.54461                           | 298          |
| c <sub>2</sub>   | 1.63051                           | 1.07374                           | 1.08093                           | 1.14268                           | 298          |
| Chi <sup>2</sup> | 1.21097E-5                        | 1.91581E-5                        | 1.08093                           | 5.25944E-5                        | 298          |
| R <sup>2</sup>   | 0.9999                            | 0.9999                            | 0.9999                            | 0.999                             | 298          |

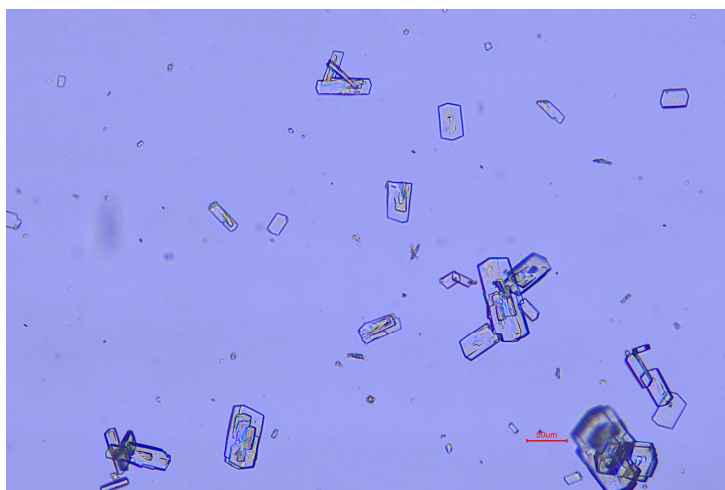

**Fig. S1** Optical microscope image of the as-synthesized crystals of **HIAM-317**.

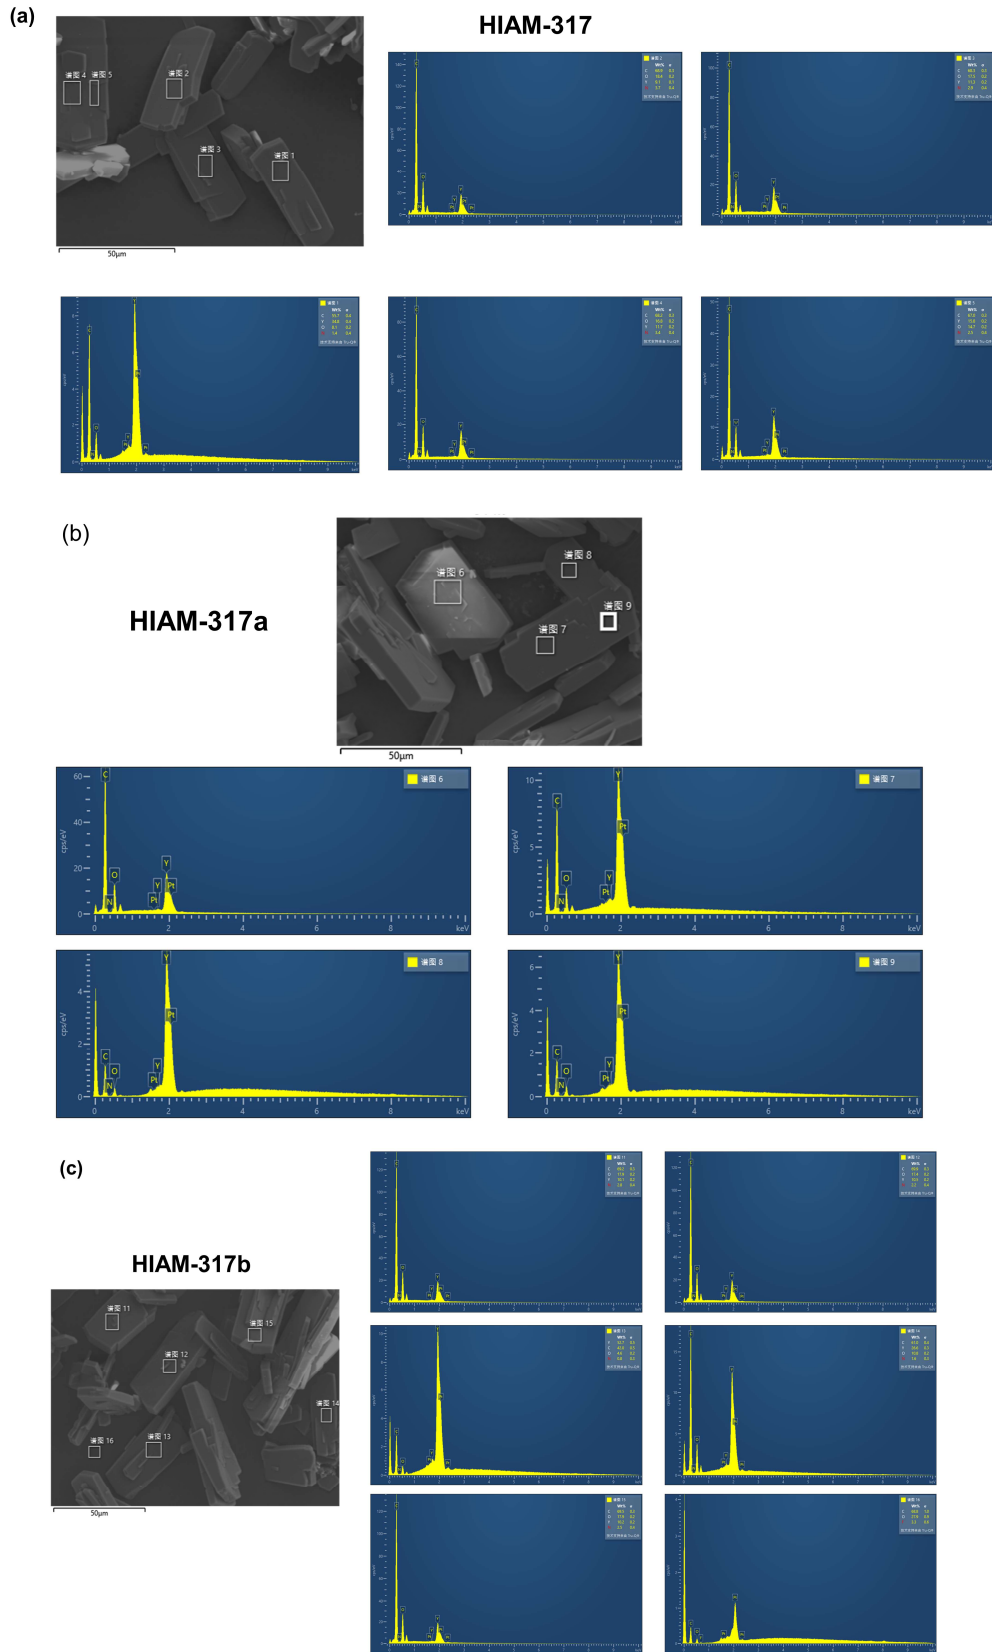

**Fig. S2** The SEM and SEM-EDX patterns for **HIAM-317** (a), **HIAM-317a** (b), and **HIAM-317b** (c).

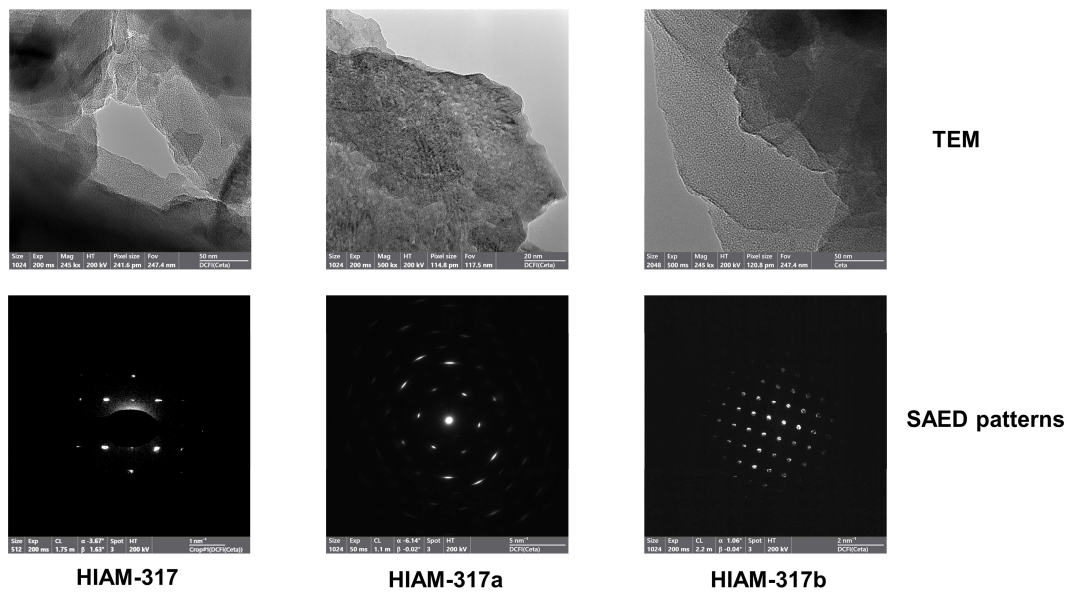

**Fig. S3** The TEM and SAED patterns for **HIAM-317**, **HIAM-317a**, and **HIAM-317b**.

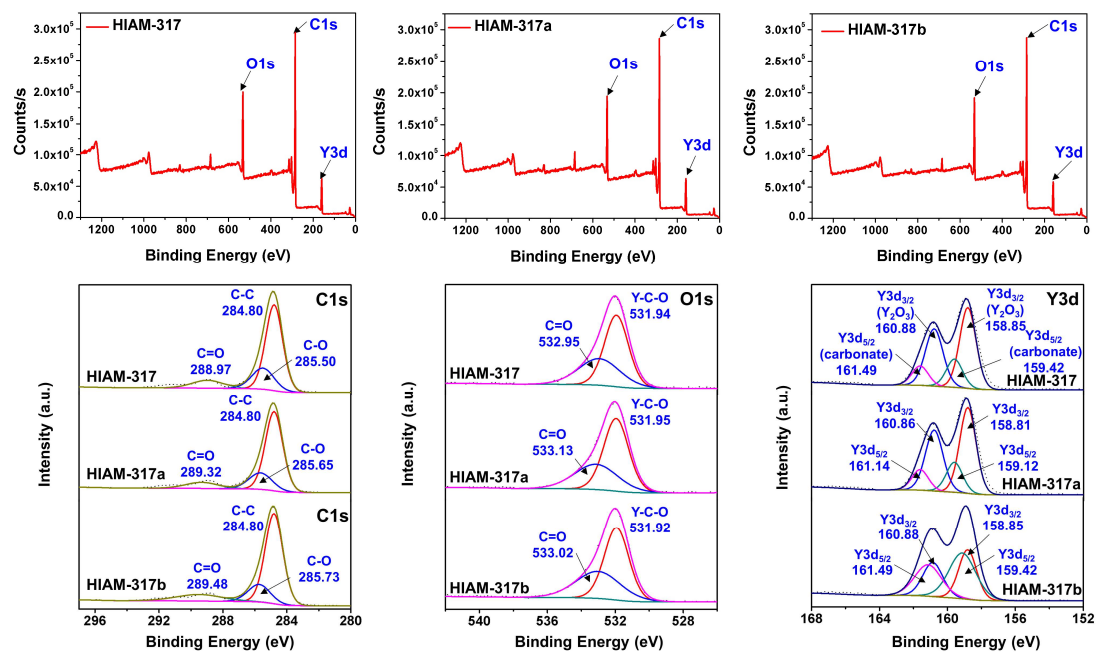

Fig. S4 The XPS spectra (including high-resolution spectrum) for HIAM-317, HIAM-317a and HIAM-317b.



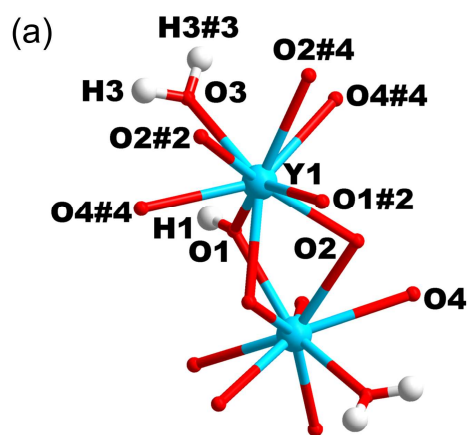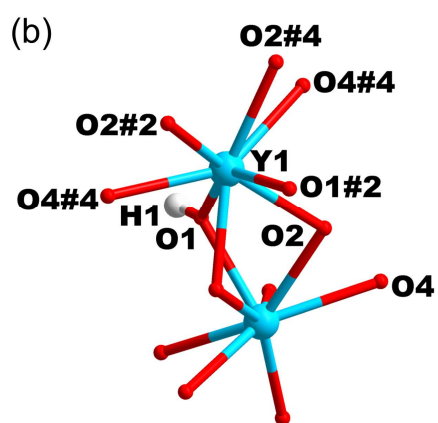

**Fig. S5** The coordination mode of **HIAM-317a** and **HIAM-317b**. (Symmetric code: #2 =  $1/2+x$ ,  $3/2-y$ ,  $1-z$ ; #3 =  $x$ ,  $y$ ,  $1-z$ ; #4 =  $1/2+x$ ,  $3/2-y$ ,  $z$ )

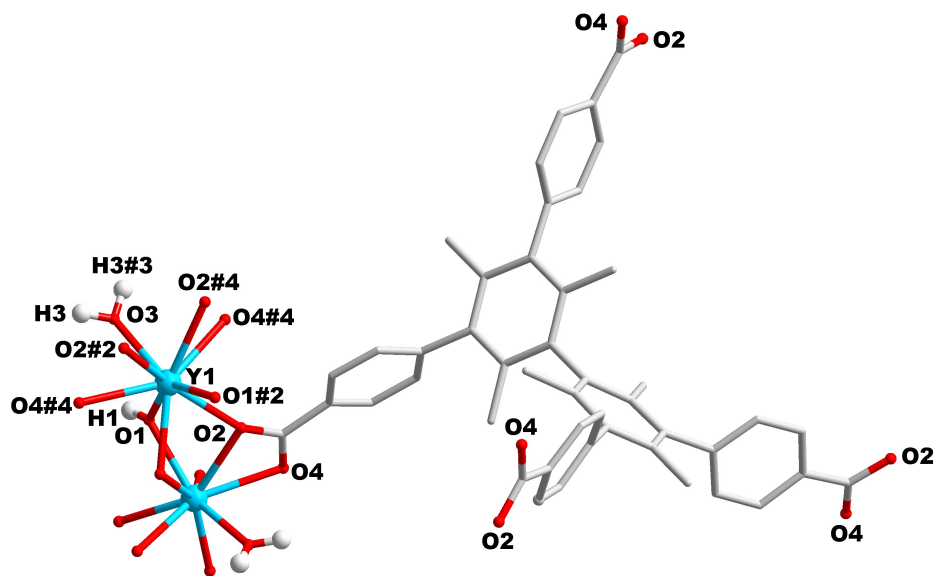

**Fig. S6** The asymmetric unit of **HIAM-317**. (Symmetric code: #2 =  $1/2+x, 3/2-y, 1-z$ ; #3 =  $x, y, 1-z$ ; #4 =  $1/2+x, 3/2-y, z$ )

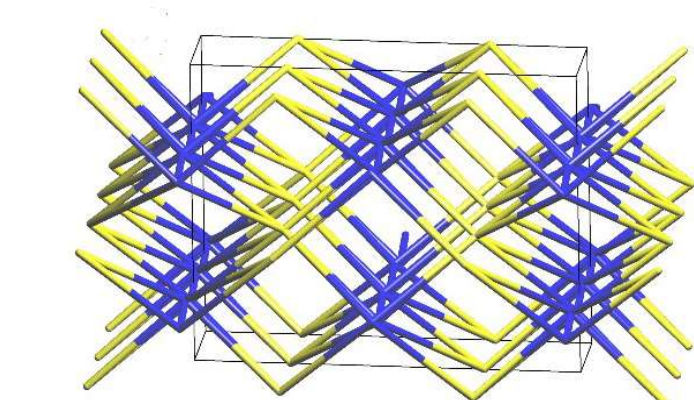

a) **6,8-c sea**

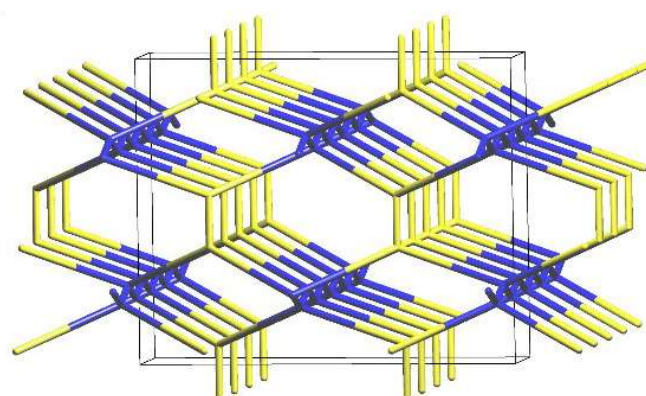

b) **3,4-c jeb**

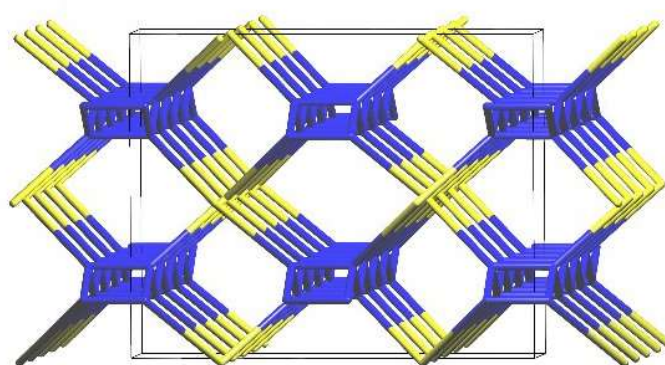

c) **4,4-c frl**

Fig. S7 The topological representations of HIAM-317.

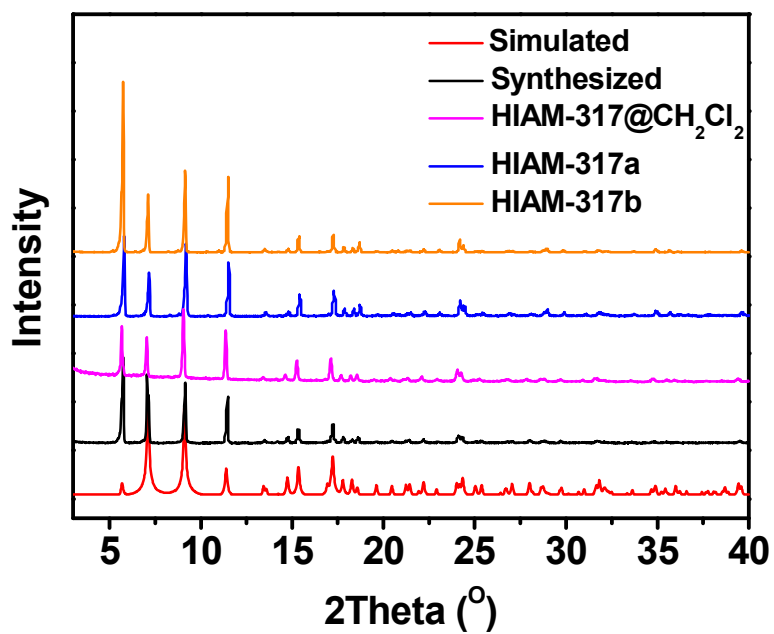

Fig. S8 Simulated and experimental PXRD patterns of **HIAM-317** in different forms.

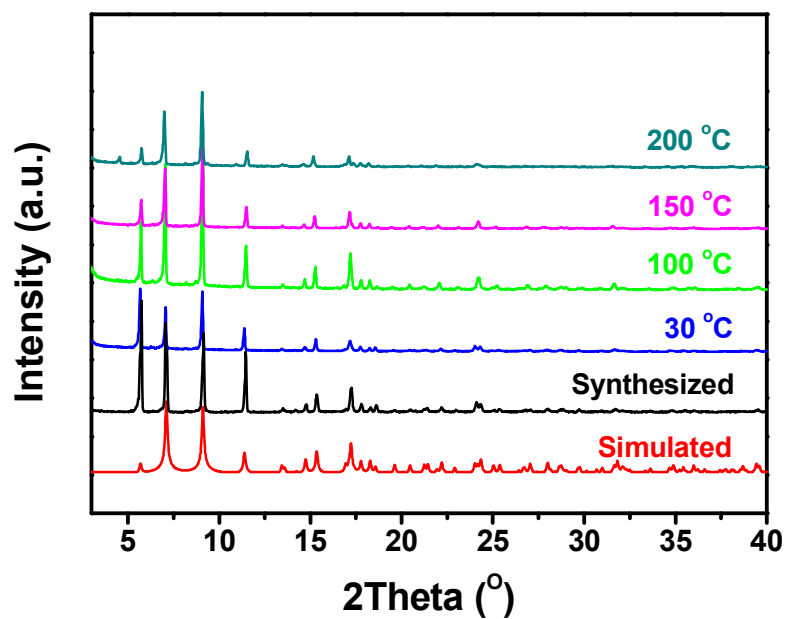

Fig. S9 In-situ PXRD patterns of **HIAM-317** collected at different temperatures and under ambient air atmosphere.

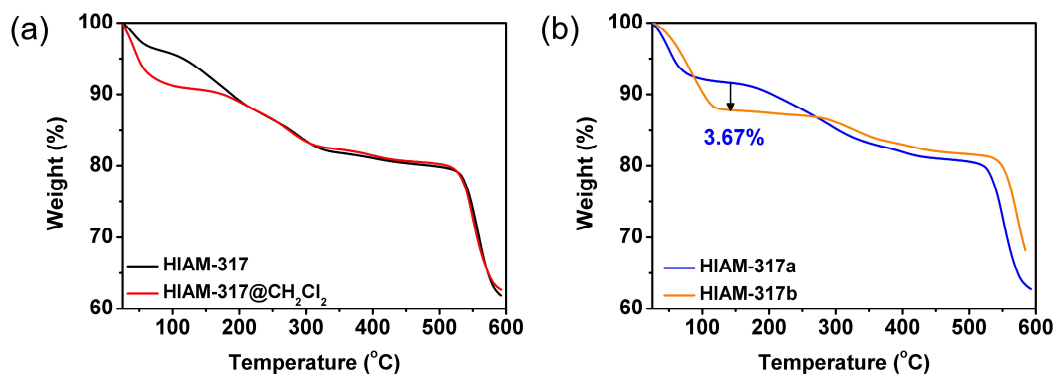

**Fig. S10** (a) TGA curves of as-synthesized and CH<sub>2</sub>Cl<sub>2</sub>-exchanged samples of **HIAM-317**; (b) TGA curves of **HIAM-317a** and **HIAM-317b**.

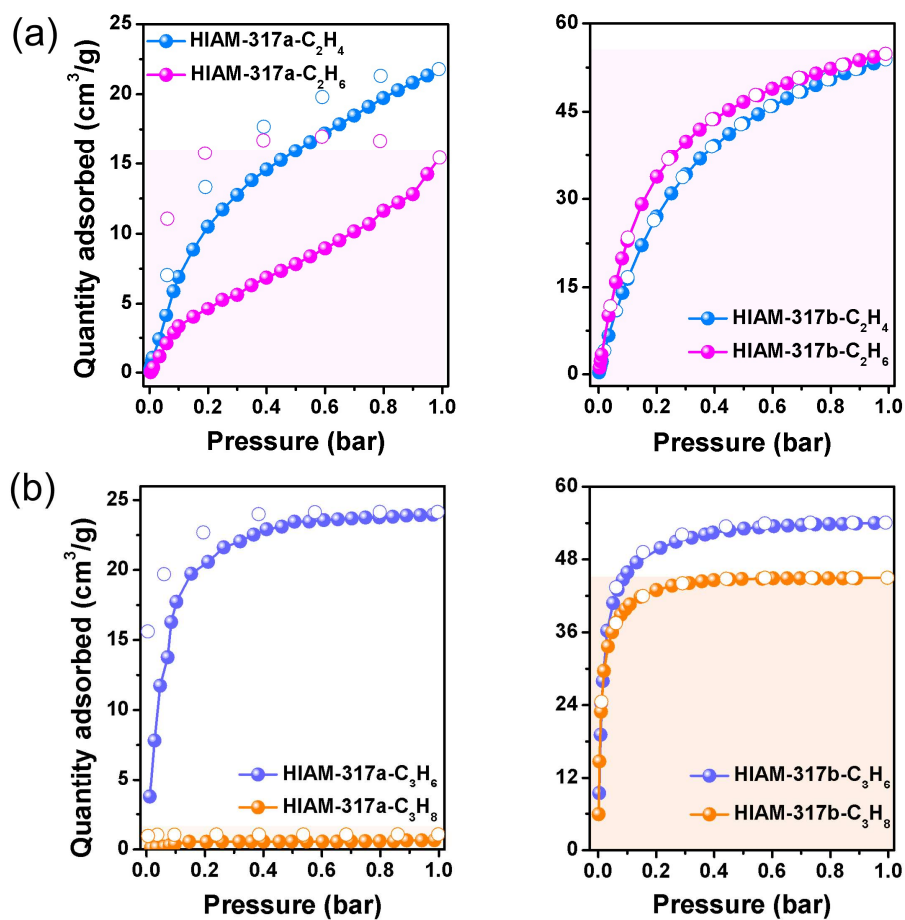

Fig. S11 Adsorption isotherms of  $C_2H_4$  and  $C_2H_6$  (a) and  $C_3H_6$  and  $C_3H_8$  (b) for **HIAM-317a** and **HIAM-317b** at 273 K.

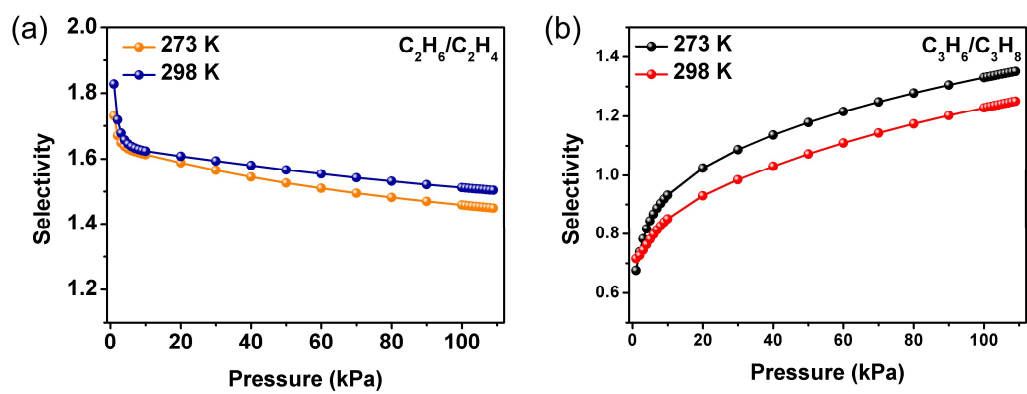

**Fig. S12** IAST selectivity of **HIAM-317b** for equimolar binary  $C_2H_6/C_2H_4$  (a) and  $C_3H_6/C_3H_8$  (b) mixtures at 273 and 298 K.

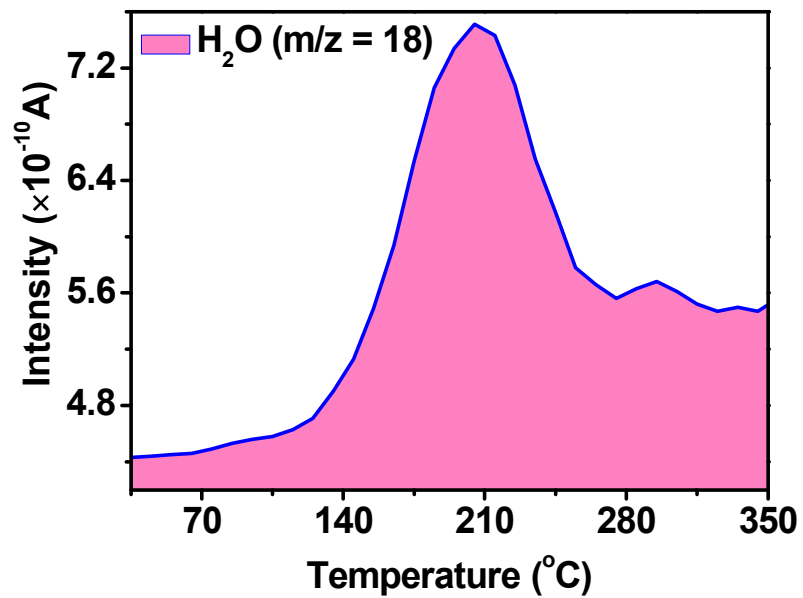

Fig. S13 TG-MS curve of CH<sub>2</sub>Cl<sub>2</sub>@HIAM-317.



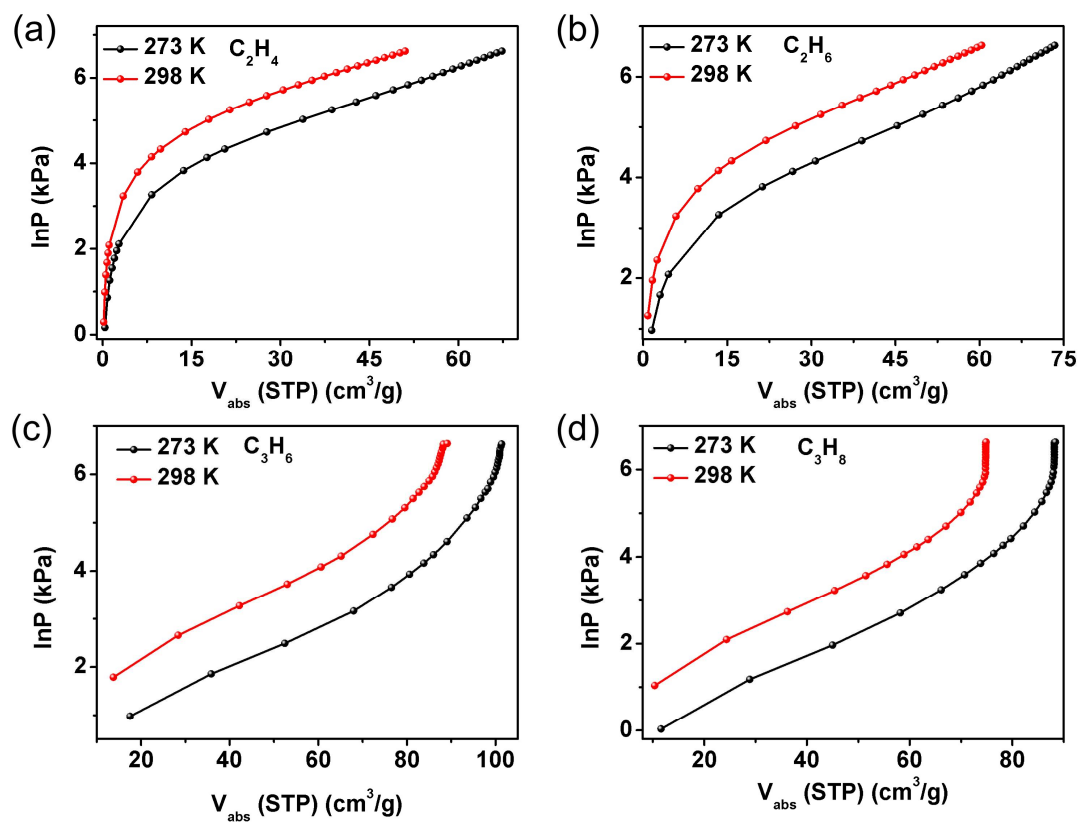

**Fig. S14** Fitted adsorption isotherms of  $\text{C}_2\text{H}_4$  (a),  $\text{C}_2\text{H}_6$  (b),  $\text{C}_3\text{H}_6$  (c) and  $\text{C}_3\text{H}_8$  (d) for **HIAM-317b**.

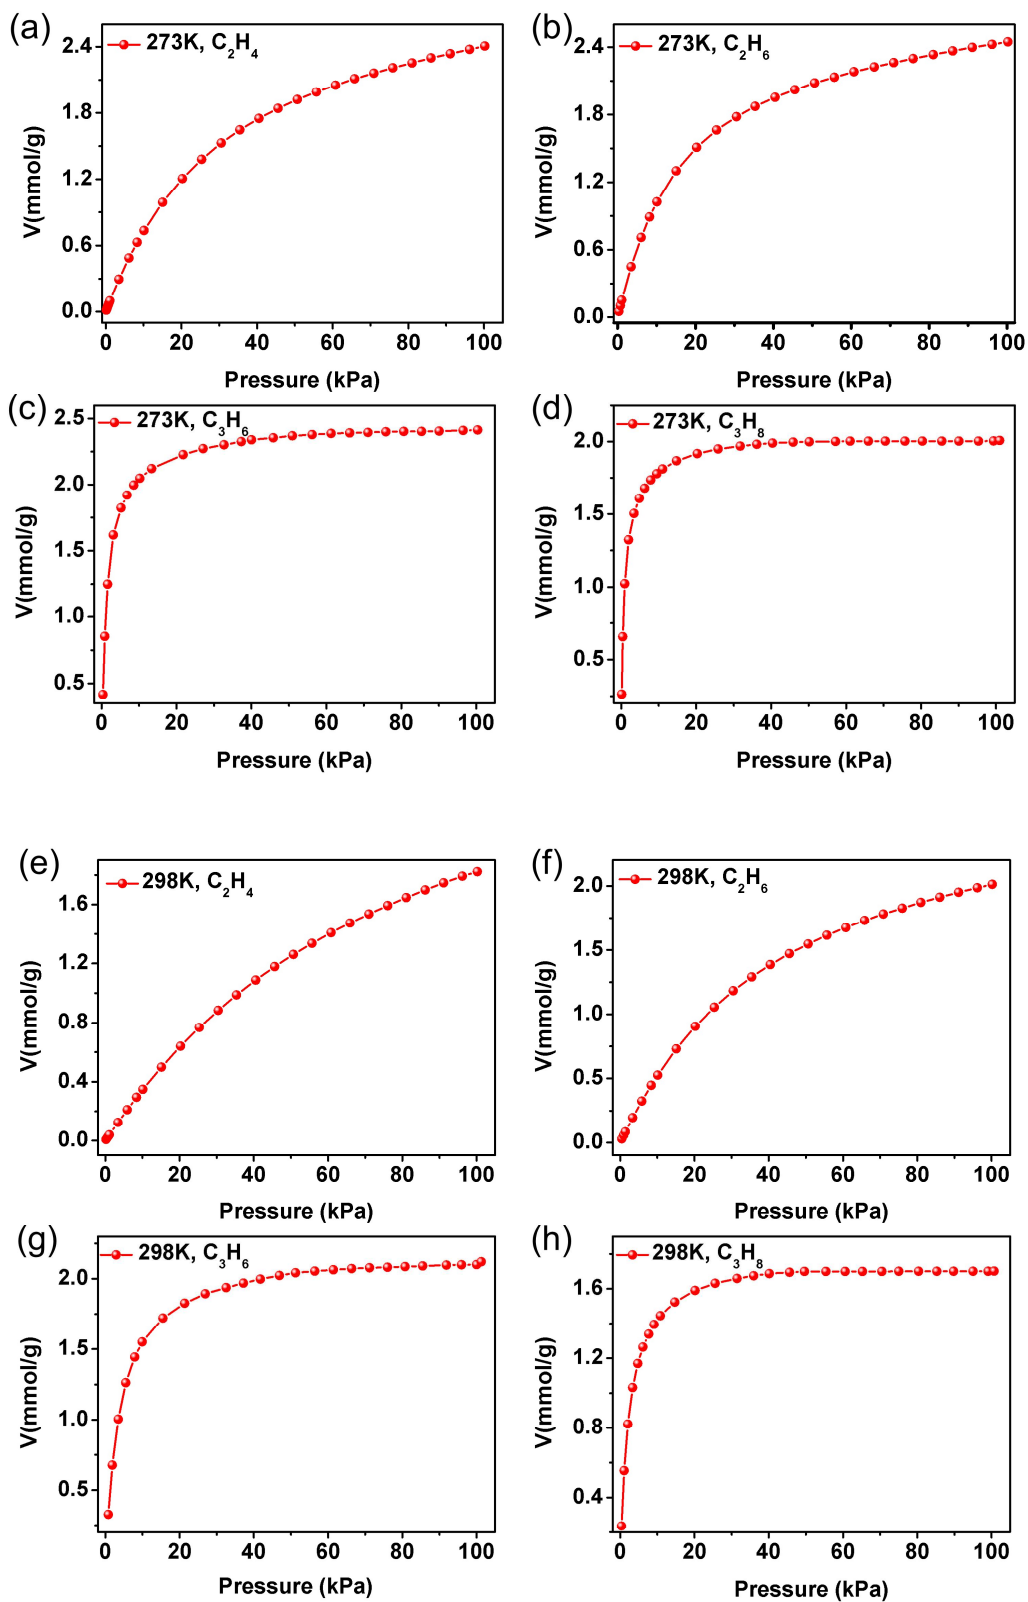

**Fig. S15** Fitted adsorption isotherms of  $C_2H_4$ ,  $C_2H_6$ ,  $C_3H_6$  and  $C_3H_8$  at 273 K (a)-(d) and 298 K (e)-(h) for HIAM-317b.

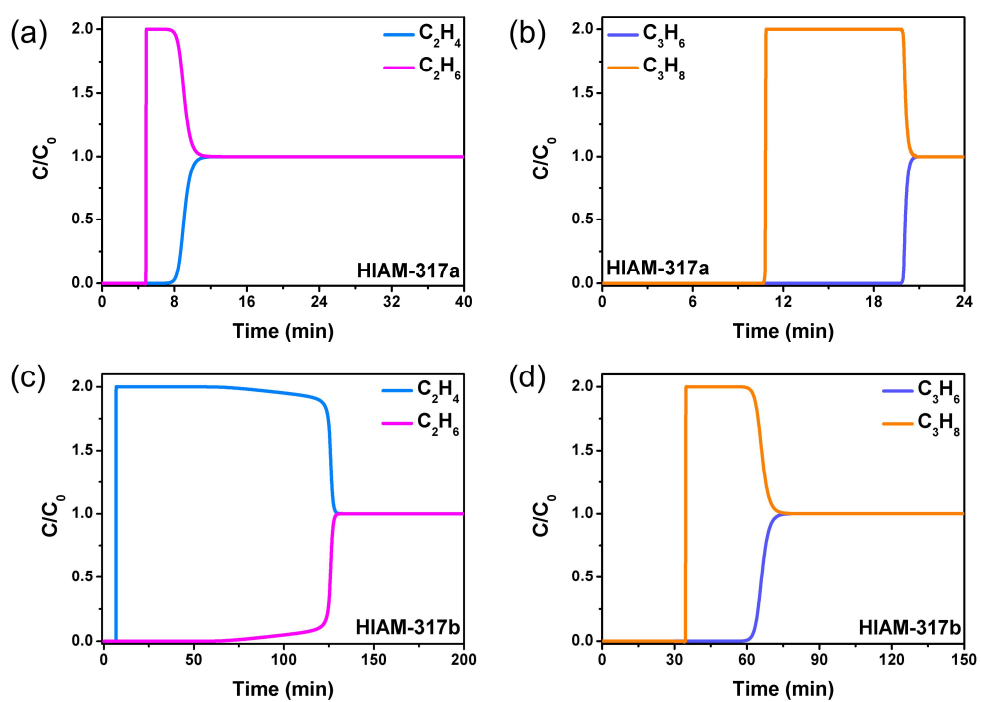

**Fig. S16** Simulation of breakthrough experiments for  $C_2H_4/C_2H_6$  (v/v, 1/1) and  $C_3H_6/C_3H_8$  (v/v, 1/1) on **HIAM-317a** and **HIAM-317b** at 298K and 100 kPa.

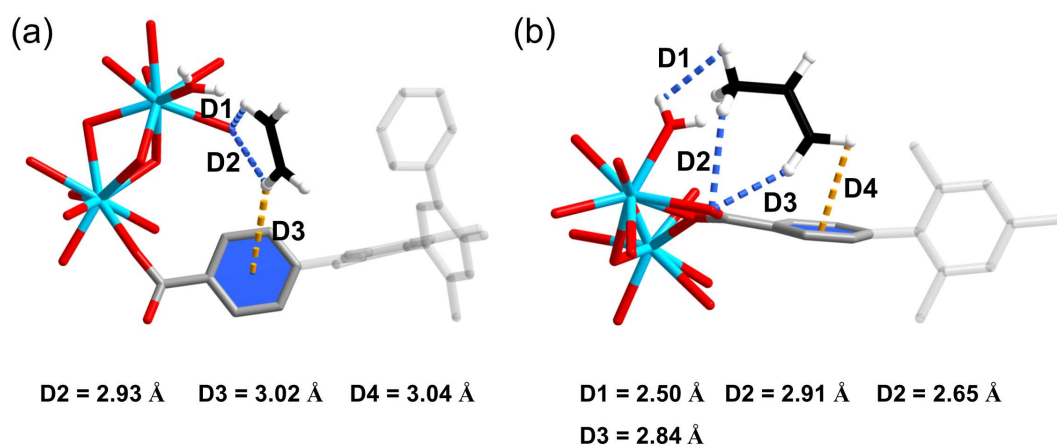

**Fig. S17** The preferential adsorption sites of **HIAM-317a** for  $C_2H_4$  (a) and  $C_3H_6$  (b). The  $C-H \cdots \pi$  and  $C-H \cdots O$  interactions are presented by orange and orange dashed line respectively.

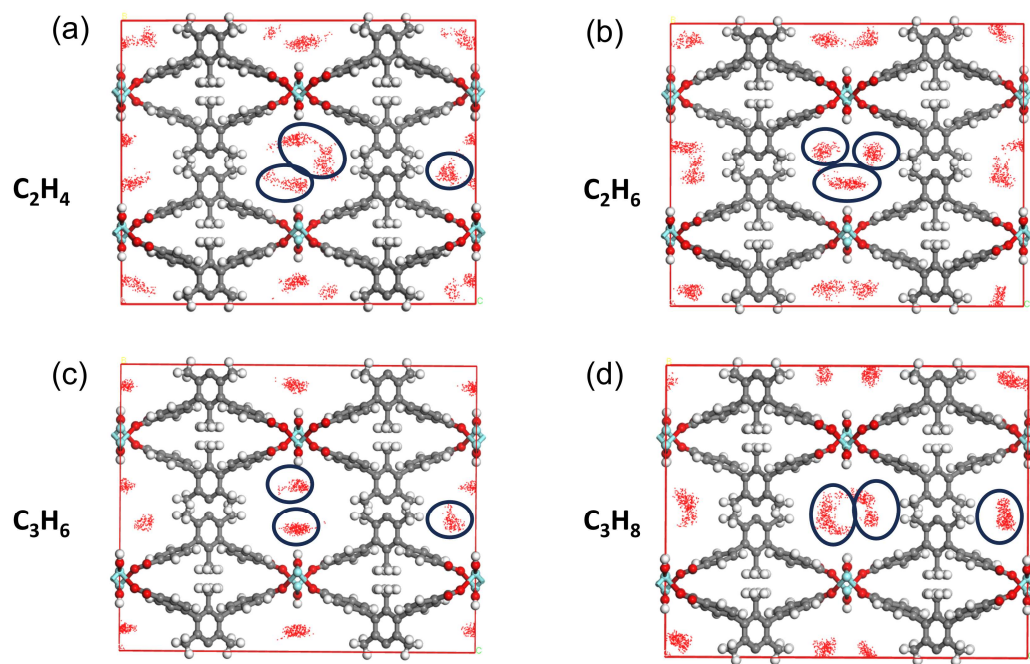

**Fig. S18** The depth of field map of density distribution of  $C_2H_4$  (a),  $C_2H_6$  (b),  $C_3H_6$  (c) and  $C_3H_8$  (d) in **HIAM-317b** at 298K, 100 kPa.
